# Supplementary material for: Effects of dual mycorrhizal inoculation on Pinus strobus seedlings are influenced by soil resource availability
Source: Research Square preprint supplement (doi:10.21203/rs.3.rs-1447489/v1), 2022-03-15
Supplement: Supplementary file 1 [file 85170dee66c0131c27f17ce7.docx]

**Effects of dual mycorrhizal inoculation on *Pinus strobus* seedlings are influenced by soil resource availability**

Supplemental Information:


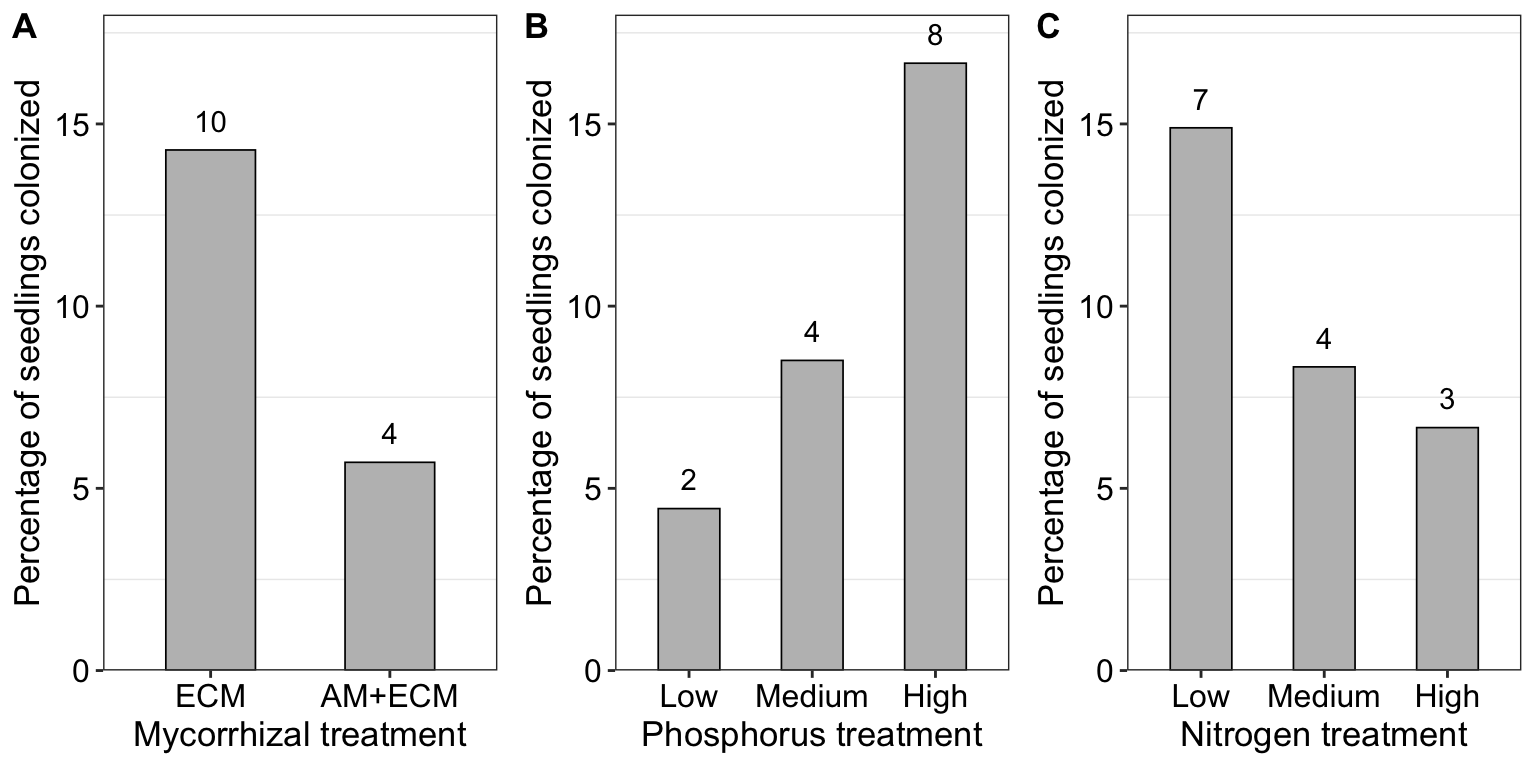


**Fig. S1** Percentage of inoculated seedlings with ectomycorrhizal colonization by treatment. Numbers above the bars indicate number of seedlings in each group.


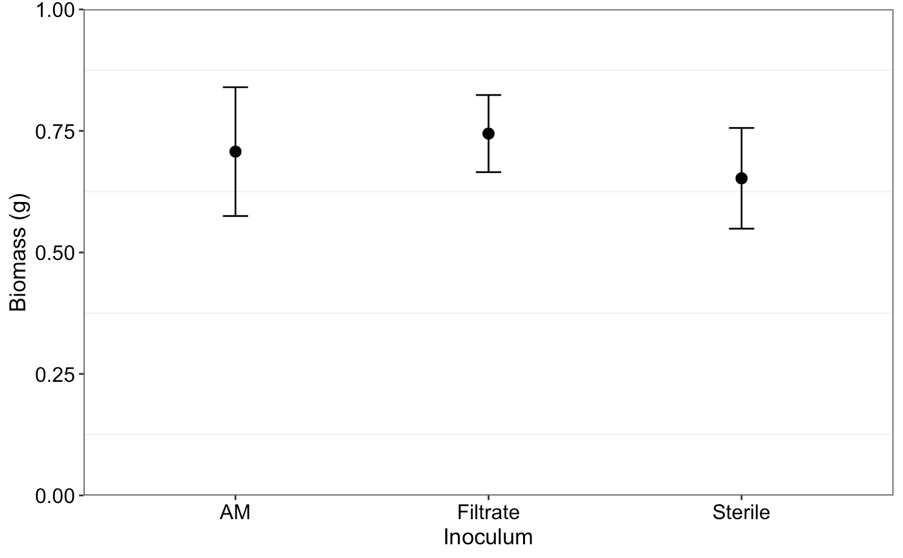


**Fig. S2** *P. strobus* seedling biomass in response to AM inoculum, AM microbial filtrate, and sterile AM inoculum in Experiment 2.

**Fig. S3** *Pinus strobus* seedling aboveground tissue A) [P], B) [N], C) [Mn], and D) N:P ratio (mean ± SE) response to N fertilization and mycorrhizal treatment. Ectomycorrhizal (ECM) treatment includes only seedlings with ECM colonization and arbuscular mycorrhizal (AM) treatment includes all seedlings inoculated with AM fungi. Sample sizes labeled in panel D.


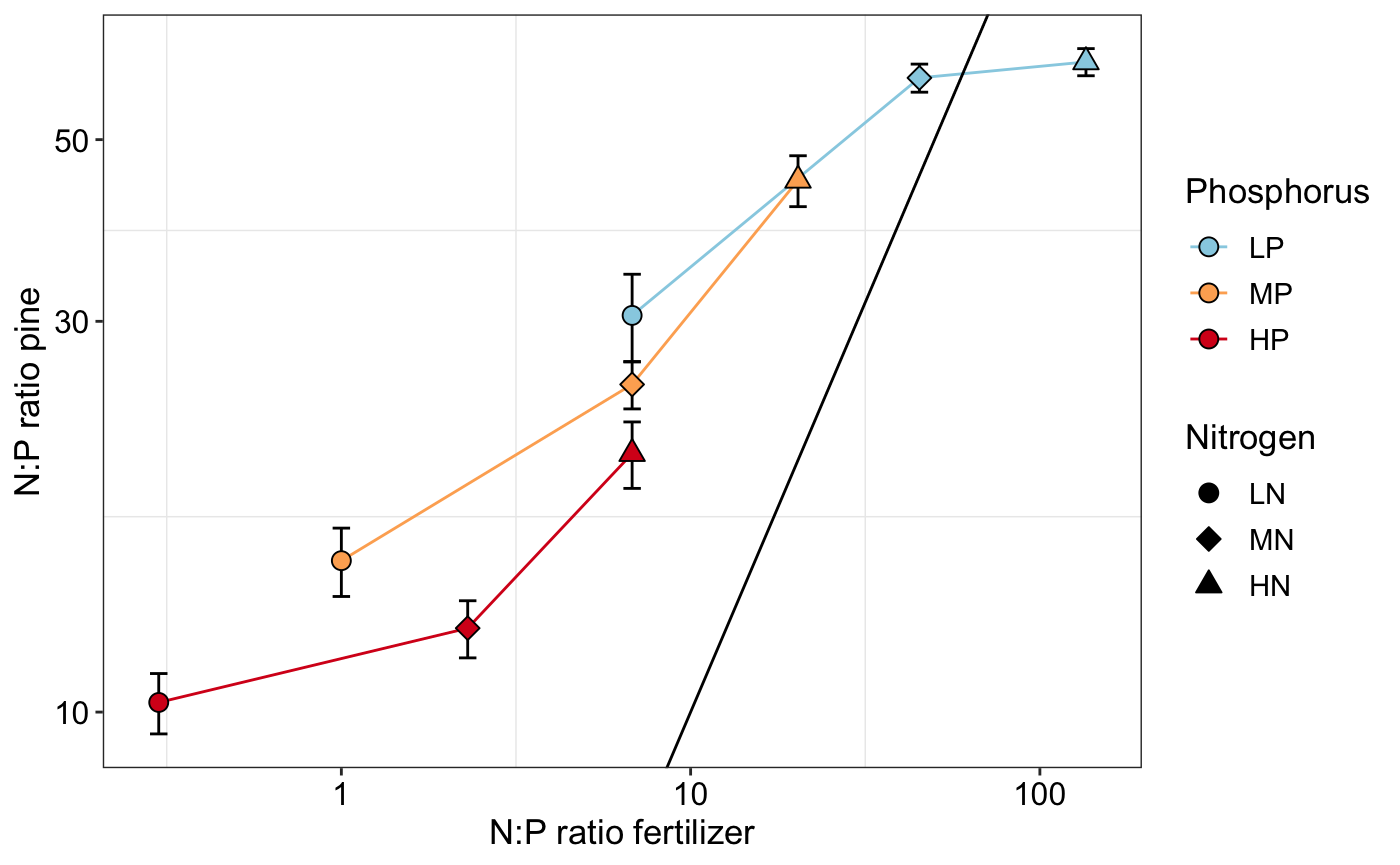


**Fig. S4** Log of N:P ratio of aboveground *P. strobus* tissue vs N:P ratio of fertilizer applied. Points show the mean ± SE of all N and P treatment combination. The black line indicates a 1:1 ratio.

**Table S1** List of seedlings that died prior to the completion of the experiment and their respective treatments. N= no mycorrhizae; A= arbuscular mycorrhizae; E= ectomycorrhizae; AE= arbuscular and ectomycorrhizae. L= low, M= medium, H= high nitrogen or phosphorus.

| Myco | N | P | date died |
| --- | --- | --- | --- |
| N | LN | LP | 17-May-19 |
| AE | HN | LP | 2-Jun-19 |
| A | HN | MP | 24-May-19 |
| E | HN | MP | 05-Mar-19 |
| E | LN | LP | 02-Jun-19 |
| N | MN | LP | 21-May-19 |
| A | LN | LP | 05-Mar-19 |
| AE | HN | LP | 21-Feb-19 |

**Table S2** Linear model results of *Pinus strobus* diameter, biomass, and root:shoot allocation responses to arbuscular mycorrhizal inoculation, ectomycorrhizal colonization, and nitrogen and phosphorus fertilization. Values of P < 0.05 are shown in bold.

|  |  | Diameter | | | Total biomass | | | Root:shoot ratio | | |
| --- | --- | --- | --- | --- | --- | --- | --- | --- | --- | --- |
|  | Df | Sum Sq | F value | P-value | Sum Sq | F value | P-value | Sum Sq | F value | P-value |
| AM | 1 | 0.812 | 17.676 | **<0.001** | 4.975 | 31.375 | **<0.001** | 0.322 | 3.692 | 0.057 |
| ECM | 1 | 1.894 | 41.227 | **<0.001** | 8.519 | 53.722 | **<0.001** | 0.128 | 1.469 | 0.228 |
| Nit | 1 | 0.000 | 0.001 | 0.979 | 0.846 | 5.336 | **0.022** | 8.276 | 94.845 | **<0.001** |
| Phos | 1 | 25.375 | 552.370 | **<0.001** | 117.401 | 740.386 | **<0.001** | 2.203 | 25.244 | **<0.001** |
| AM:ECM | 1 | 0.055 | 1.200 | 0.275 | 0.317 | 1.996 | 0.160 | 0.028 | 0.321 | 0.572 |
| AM:Nit | 1 | 0.015 | 0.335 | 0.564 | 0.226 | 1.425 | 0.235 | 0.088 | 1.005 | 0.318 |
| AM:Phos | 1 | 0.000 | 0.000 | 0.999 | 0.064 | 0.404 | 0.526 | 0.169 | 1.936 | 0.166 |
| ECM:Nit | 1 | 0.000 | 0.000 | 0.991 | 0.010 | 0.065 | 0.799 | 0.006 | 0.072 | 0.789 |
| ECM:Phos | 1 | 0.534 | 11.632 | **0.001** | 1.856 | 11.706 | **0.001** | 0.945 | 10.825 | **0.001** |
| Nit:Phos | 1 | 0.036 | 0.777 | 0.380 | 0.066 | 0.416 | 0.520 | 0.000 | 0.001 | 0.971 |
| AM:ECM:Nit | 1 | 0.057 | 1.241 | 0.267 | 0.117 | 0.738 | 0.392 | 0.001 | 0.015 | 0.904 |
| AM:ECM:Phos | 1 | 0.195 | 4.239 | **0.041** | 0.181 | 1.141 | 0.287 | 0.092 | 1.053 | 0.307 |
| AM:Nit:Phos | 1 | 0.000 | 0.001 | 0.973 | 0.000 | 0.001 | 0.977 | 0.012 | 0.138 | 0.711 |
| ECM:Nit:Phos | 1 | 0.003 | 0.055 | 0.815 | 0.108 | 0.679 | 0.411 | 0.108 | 1.238 | 0.268 |
| Residuals | 139 | 6.385 |  |  | 22.041 |  |  | 12.129 |  |  |

**Table S3** Linear model results of *Pinus strobus* aboveground tissue nutrient concentration responses to arbuscular mycorrhizal inoculation, ectomycorrhizal colonization, and nitrogen and phosphorus fertilization. Values of P < 0.05 are shown in bold.

|  |  | Tissue P | | |  | Tissue N | | |  | Tissue Mn | | |  | Tissue N:P | | |
| --- | --- | --- | --- | --- | --- | --- | --- | --- | --- | --- | --- | --- | --- | --- | --- | --- |
|  | Df | Sum Sq | F value | P | Df | Sum Sq | F value | P | Df | Sum Sq | F value | P | Df | Sum Sq | F value | P |
| AM | 1 | 0.059 | 0.840 | 0.361 | 1 | 0.116 | 1.588 | 0.210 | 1 | 7.371 | 39.447 | **<0.001** | 1 | 0.004 | 0.016 | 0.899 |
| ECM | 1 | 6.589 | 93.981 | **<0.001** | 1 | 1.378 | 18.915 | **<0.001** | 1 | 0.824 | 4.411 | **0.038** | 1 | 20.208 | 89.205 | **<0.001** |
| Nit | 1 | 2.661 | 37.960 | **<0.001** | 1 | 10.027 | 137.664 | **<0.001** | 1 | 13.141 | 70.323 | **<0.001** | 1 | 27.140 | 119.809 | **<0.001** |
| Phos | 1 | 12.284 | 175.218 | **<0.001** | 1 | 13.598 | 186.687 | **<0.001** | 1 | 1.608 | 8.608 | **0.004** | 1 | 61.040 | 269.456 | **<0.001** |
| AM:ECM | 1 | 0.075 | 1.070 | 0.303 | 1 | 0.002 | 0.027 | 0.871 | 1 | 0.041 | 0.219 | 0.641 | 1 | 0.180 | 0.795 | 0.374 |
| AM:Nit | 1 | 0.426 | 6.078 | **0.015** | 1 | 0.165 | 2.270 | 0.134 | 1 | 1.322 | 7.074 | **0.009** | 1 | 1.459 | 6.442 | **0.012** |
| AM:Phos | 1 | 0.237 | 3.387 | 0.068 | 1 | 0.381 | 5.227 | **0.024** | 1 | 0.006 | 0.034 | 0.855 | 1 | 0.006 | 0.026 | 0.872 |
| ECM:Nit | 1 | 0.005 | 0.077 | 0.781 | 1 | 0.021 | 0.293 | 0.589 | 1 | 0.122 | 0.650 | 0.421 | 1 | 0.006 | 0.027 | 0.869 |
| ECM:Phos | 1 | 1.628 | 23.227 | **<0.001** | 1 | 0.322 | 4.425 | **0.037** | 1 | 0.814 | 4.357 | **0.039** | 1 | 4.832 | 21.329 | **<0.001** |
| Nit:Phos | 1 | 0.098 | 1.392 | 0.240 | 1 | 0.195 | 2.680 | 0.104 | 1 | 1.465 | 7.839 | **0.006** | 1 | 0.004 | 0.019 | 0.891 |
| AM:ECM:Nit | 1 | 0.235 | 3.347 | 0.070 | 1 | 0.199 | 2.727 | 0.101 | 1 | 0.155 | 0.832 | 0.363 | 1 | 1.335 | 5.894 | **0.017** |
| AM:ECM:Phos | 1 | 0.254 | 3.624 | 0.059 | 1 | 0.069 | 0.947 | 0.332 | 1 | 0.027 | 0.143 | 0.706 | 1 | 0.135 | 0.598 | 0.441 |
| AM:Nit:Phos | 1 | 0.011 | 0.160 | 0.690 | 1 | 0.100 | 1.373 | 0.243 | 1 | 0.017 | 0.093 | 0.761 | 1 | 0.371 | 1.638 | 0.203 |
| ECM:Nit:Phos | 1 | 0.006 | 0.090 | 0.765 | 1 | 0.059 | 0.804 | 0.371 | 1 | 0.621 | 3.321 | 0.071 | 1 | 0.136 | 0.601 | 0.439 |
| Residuals | 132 | 9.254 |  |  | 135 | 9.833 |  |  | 132 | 24.666 |  |  | 132 | 29.902 |  |  |

**Table S4** Linear model results of log of *Pinus strobus* aboveground tissue N:P ratio responses to arbuscular mycorrhizal inoculation, ectomycorrhizal colonization, and log N:P ratio of fertilization. Values of P < 0.05 are shown in bold.

|  | Df | Sum Sq | Mean Sq | F value | P |
| --- | --- | --- | --- | --- | --- |
| log(N:P.ratio) | 1 | 53.259 | 53.259 | 404.804 | **<0.001** |
| ECM | 1 | 4.593 | 4.593 | 34.913 | **<0.001** |
| AM | 1 | 0.146 | 0.146 | 1.113 | 0.293 |
| log(N:P.ratio):ECM | 1 | 2.138 | 2.138 | 16.249 | **<0.001** |
| log(N:P.ratio):AM | 1 | 0.169 | 0.169 | 1.288 | 0.258 |
| ECM:AM | 1 | 0.231 | 0.231 | 1.759 | 0.187 |
| Residuals | 140 | 18.419 | 0.132 |  |  |
